# Supplementary material for: SdhA blocks disruption of the Legionella-containing vacuole by hijacking the OCRL phosphatase
Source: PubMed Central journal article supplement — Cell Rep. Author manuscript; Available in PMC 2021 Dec 14. (PMC8669613; doi:10.1016/j.celrep.2021.109894), 2021-11-02
Supplement: NIHMS1753725-supplement-1.pdf [file NIHMS1753725-supplement-1.pdf]

Cell Reports, Volume 37

**Supplemental information**

**SdhA blocks disruption  
of the *Legionella*-containing vacuole  
by hijacking the OCRL phosphatase**

**Won Young Choi, Seongok Kim, Philipp Aurass, Wenwen Huo, Elizabeth A. Creasey, Marc Edwards, Martin Lowe, and Ralph R. Isberg**

**Supplementary Table S1. Conserved Motifs. Linked to Fig. 1.**

| Motifs                    | Pattern                      | No. | Positions in SdhA                    |
|---------------------------|------------------------------|-----|--------------------------------------|
| Clathrin box              | L[IVLMF]X[IVLMF][DE]         | 2   | 355-359 (LLSIE)<br>1177-1181 (LLYIE) |
| AP2 $\beta$ binding       | [DE]x(1,2)Fxx [FL] xxxR      | 1   | 360-370 (DSRFLALRLER)                |
| OCRL-binding<br>F&H motif | xFxx[KRIL]Hxx[YLMFH]<br>xxxx | 1   | 1194-1206<br>(AFCNRHIGLQYTD)         |

**Supplementary Table S2. From Dataset 1: Icm/Dot Translocated Effectors Having Two or More of the Conserved Motifs. Linked to Fig. 1.**

| Orf     | Gene         | Clathrin<br>Box | AP2 beta | F&H | Unique<br>motifs |
|---------|--------------|-----------------|----------|-----|------------------|
| LPG0376 | <i>sdhA</i>  | 2               | 1        | 1   | 3                |
| LPG0090 | <i>lem1</i>  | 1               | 1        | 0   | 2                |
| LPG2433 | <i>ceg30</i> | 1               | 1        | 0   | 2                |
| LPG2745 | ---          | 1               | 1        | 0   | 2                |
| LPG3000 | ---          | 1               | 0        | 1   | 2                |

**Supplemental Table S3: Identification of proteins associated with the SdhA CBM2A region. Linked to Figs. 1 and 2.**

| <b>Gene Symbol</b> | <b>Annotation</b>                   | <b>Process</b>              | <b>Relative abundance</b> | <b>CBM2A/GST</b> |
|--------------------|-------------------------------------|-----------------------------|---------------------------|------------------|
| RANGAP1            | GAP domain                          | Nuclear Egress              | 4.4E+07                   | 1.1E+04          |
| EEF1A1             | Elongation factor 1 GTPase          | Translation                 | 8.6E+06                   | 3.6E+02          |
| EIF3A              | Initiation factor 3A subunit        | Translation                 | 2.0E+06                   | 5.4E+01          |
| DDX3X              | RNA Helicase                        | Translation                 | 1.1E+06                   | 3.3E+02          |
| EIF3C              | Initiation factor 3C subunit        | Translation                 | 1.1E+06                   | 7.9E+01          |
| YARS               | Tyr tRNA synthetase                 | Translation                 | 7.4E+05                   | 4.1E+02          |
| DHX9               | RNA helicase A                      | RNA metabolism              | 5.9E+05                   | 3.7E+01          |
| <b>AP3D1</b>       | <b>AP-3 delta subunit</b>           | <b>Vesicle adaptor</b>      | <b>5.7E+05</b>            | <b>6.9E+01</b>   |
| EIF5B              | Initiation factor 5B GTP binding    | Translation                 | 5.7E+05                   | 5.2E+01          |
| EIF4G2             | Initiation factor 4G2 subunit       | Translation                 | 4.0E+05                   | 5.7E+00          |
| EIF3D              | Initiation factor 3D subunit        | Translation                 | 2.6E+05                   | 2.2E+01          |
| EEF1G              | Elongation factor 1 subunit         | Translation                 | 2.3E+05                   | 3.3E+01          |
| <b>OCRL</b>        | <b>Inositol 5-phosphatase (GAP)</b> | <b>Vesicle traffic</b>      | <b>1.9E+05</b>            | <b>1.2E+01</b>   |
| IQGAP1             | GAP domain                          | Membrane/cytoskeleton       | 1.7E+05                   | 3.3E+01          |
| EIF3L              | Initiation factor 3L                | Translation                 | 1.2E+05                   | 5.2E+01          |
| G3BP2              | GAP-binding protein 2               | Stress Granules             | 1.2E+05                   | 5.5E+00          |
| G3BP1              | GAP-binding protein 1               | Stress Granules             | 9.8E+04                   | 4.5E+01          |
| SERBP1             | RNA-binding protein                 | Translation                 | 7.6E+04                   | 2.6E+01          |
| EIF3E              | Initiation factor 3E                | Translation                 | 7.2E+04                   | 1.6E+01          |
| YTHDF3             | YTH domain-protein 3 OS             | m6A reader                  | 7.1E+04                   | 5.1E+00          |
| CLASP2             | CLASP 2 (IQGAP Binding)             | Clathrin Associated Sorting | 3.1E+04                   | 7.9E+00          |

Extracts were incubated with either GST or CBM2A-GST immobilized on glutathione beads, and eluted proteins were analysis by LC MS/MS analysis (STAR Methods). Relative quantities of peptides identified from each protein were determined from both the GST and CBM2A-GST eluates and expressed as a ratio (CBM2A/GST). Proteins in which (CBM2A/GST)  $\geq 5$  are displayed.

**Supplementary Table S4. Oligonucleotides used in this study. Linked to STAR Methods, Key resources.**

| Name   | Sequences                                                       | Purpose                          |
|--------|-----------------------------------------------------------------|----------------------------------|
| Owy77  | gtgaagaattcga <del>aaa</del> aggagaagagttactcagtatag            | SdhA-CBM1                        |
| Owy63  | gtgaactc <del>gag</del> ttagggggtccaatattttgt                   |                                  |
| Owy81  | gtgaaGAATTCggaatgatatgtataaaacaccaatagatc                       | SdhA-CBM2                        |
| Owy82  | gtgaaCTCGAGttaaagatgataatatttctcaaaattatctct                    |                                  |
| Owy84  | tgctcagtgtattgtaaacctatagcacgggtgcaggcagcatctaattgtttattaaatg   | CBM2 (F1195A<br>H1199A) mutation |
| Owy83  | catttaataaacaattagatgctGCCtgaaccgtGCTataggtttacaatacactga<br>ca |                                  |
| Owy72  | cgactcaggaacaagaagatgccgcttatatagaagaatacactacagaatc            | CBM2 (L1177A<br>L1178A) mutation |
| Owy73  | gattctgtagtgtattcttctatataagcggcatcttctgttcctgagtcg             |                                  |
| Owy89  | aaggaatatgcacaaaacttagagaata                                    | CBM2 $\Delta$ FH deletion        |
| Owy90  | atctaattgtttattaatgattctgtagtgtattc                             |                                  |
| Owy81  | gtgaaGAATTCggaatgatatgtataaaacaccaatagatc                       | CBM2A                            |
| Owy113 | gtgaaCTCGAGttaagtggtttgcaccttttg                                |                                  |
| Owy114 | gtgaaGAATTCaaaggtggcaaaaccactgat                                | CBM2B                            |
| Owy115 | gtgaaCTCGAGttaaggatcaggatctgtattctgg                            |                                  |
| Owy79  | gtgaaGAATTCagctaccatcattatgaaggctt                              | CBM2C                            |
| Owy117 | gtgaaCTCGAGttatgtagtgtattcttctatataaaggag                       |                                  |
| Owy116 | gtgaaGAATTCattcaacgctcaaaatccgcag                               | CBM2D                            |
| Owy82  | gtgaaCTCGAGttaaagatgataatatttctcaaaattatctct                    |                                  |
| Owy100 | gtgaaGGATCCaaggttgggatgaacgaagg                                 | OCRL-<br>ASH/RhoGAP              |
| Owy101 | gtgaaCTGCAGttagtcttctcgtcccaag                                  |                                  |
| Owy100 | gtgaaGGATCCaaggttgggatgaacgaagg                                 | OCRL-ASH                         |

|        |                                                   |                            |
|--------|---------------------------------------------------|----------------------------|
| Owy133 | gtgaa <u>CTGCAG</u> Gttaactgggaggttaattccactg     |                            |
| Owy134 | gtgaa <u>GGATCC</u> agttgtttggcacatccttagag       | OCRL-RhoGAP                |
| Owy101 | gtgaa <u>CTGCAG</u> ttagtcttcttcgctccaag          |                            |
| Owy14  | gtgaag <u>tcgac</u> atttcagaaaagatcaagctttagaatcc | pJB908-3xflag- <i>sdhA</i> |
| Owy15  | gtgaact <u>gcag</u> ttatgcggatggcgctaata          |                            |
| Owy137 | 5'phos/gatgcagtaagagtcgctttagc                    | <i>sdhA</i> Δ1029-1260aa   |
| Owy138 | 5'phos/aatatgtgctttggaatgcagcgc                   | (ΔCBM2)deletion            |
| Owy139 | 5'phos/gatgatgaattaatcgaaactataaaaaag             | <i>sdhA</i> Δ1029-1080aa   |
| Owy138 | 5'phos/aatatgtgctttggaatgcagcgc                   | (ΔCBM2A)deletion           |

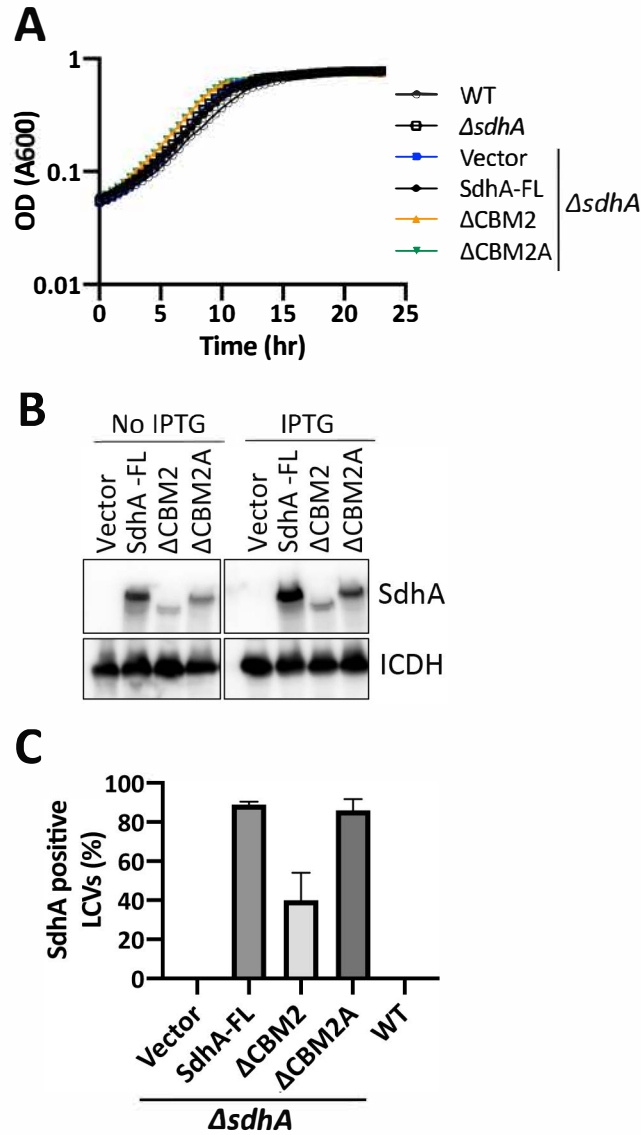

**Figure S1. Characterization of SdhA mutants. Linked to Figs. 2 and 3.**

(A) Growth of noted strains in AYE broth. Strains with  $\Delta sdhA$  allele have noted genes inserted into pJB908 (Vector). Shown are singlicate cultures (B) Western blot analysis of expression levels of SdhA variants. Isocitrate dehydrogenase (ICDH) was used for loading control. (C) The presence of SdhA variants on LCV surface was assessed by fluorescence microscopy as in Fig. 3A. SdhA is undetectable in WT strain and must be overproduced on pJB908 to identify by immunofluorescence microscopy. Each of the  $\Delta sdhA$  strains harbor pJB908 with noted chromosomal fragments. Data represents means and SDs of biological triplicates. More than 100 LCVs were counted per replicate.

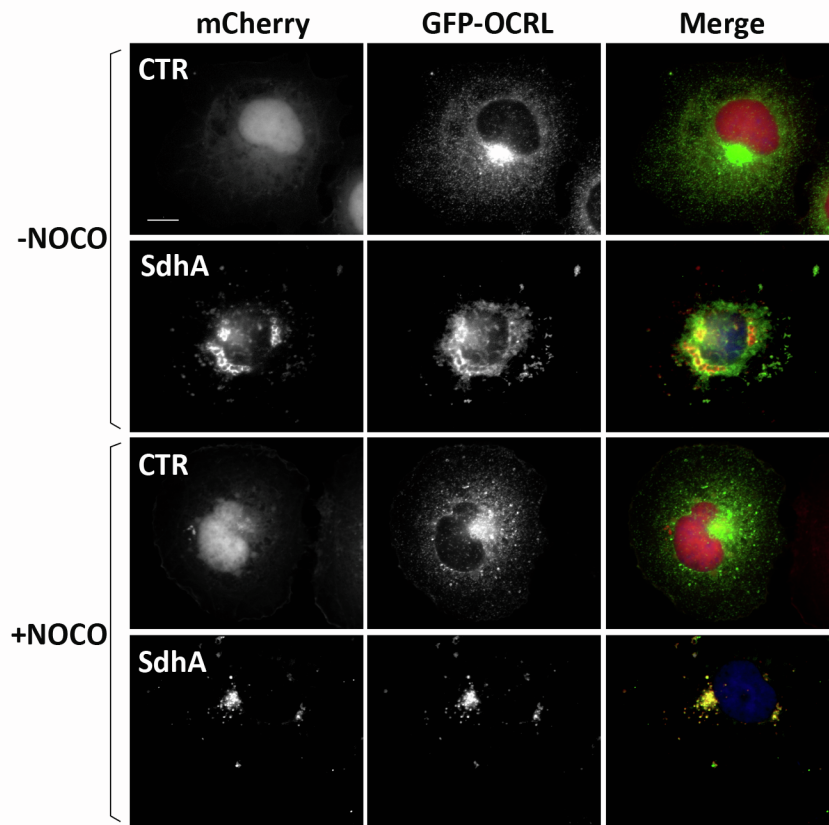

**Figure S2. Ectopically expressed SdhA associates with OCRL positive compartments. Linked to Fig. 4.**

Representative micrographs of fixed COS-7 cells coexpressing mCherry-SdhA (red) and GFP-tagged OCRL. DNA was labeled by Hoechst stains (blue). Cells were treated with nocodazole (NOCO) to release aggregation of the compartments. (Scale bar, 10  $\mu$ m)

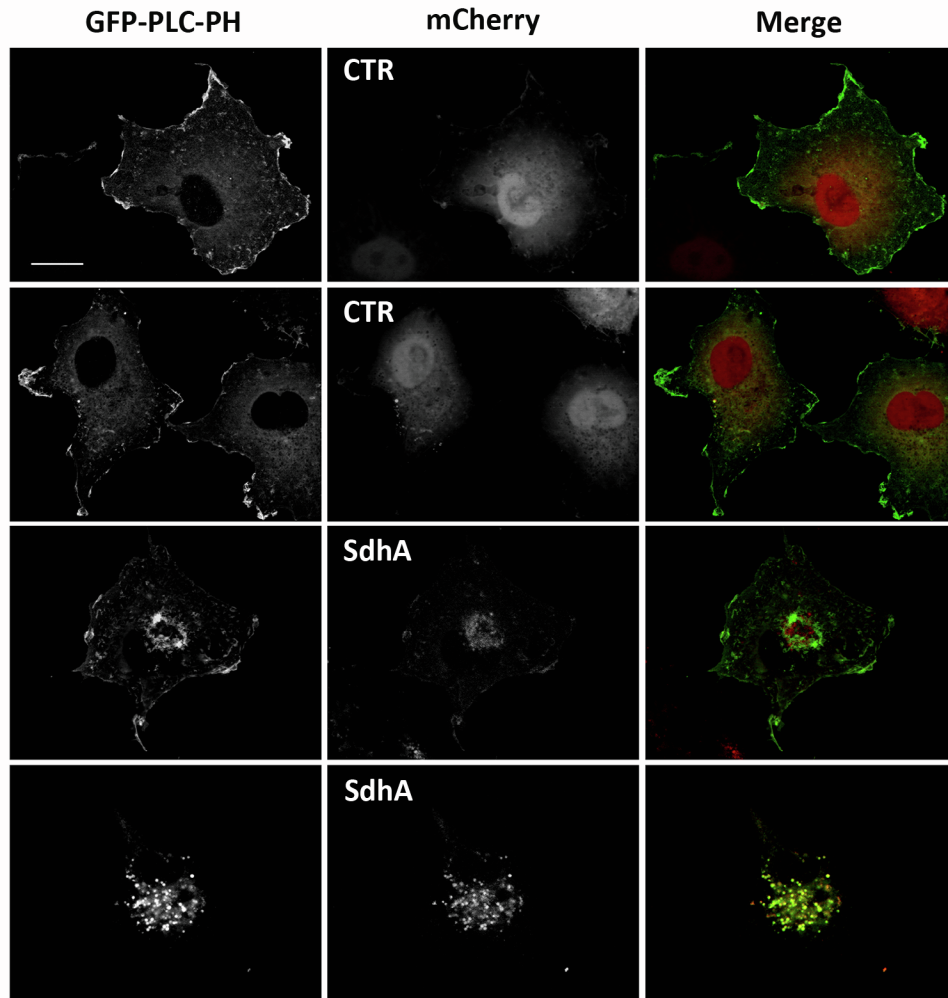

**Figure S3. COS-7 cells coexpressing mCherry-SdhA and GFP-PLC $\delta$ -PH demonstrate rearrangement and internalization of PI(4,5)P<sub>2</sub>. Linked to Fig. 4.**

Scale bar represents 20  $\mu$ m.



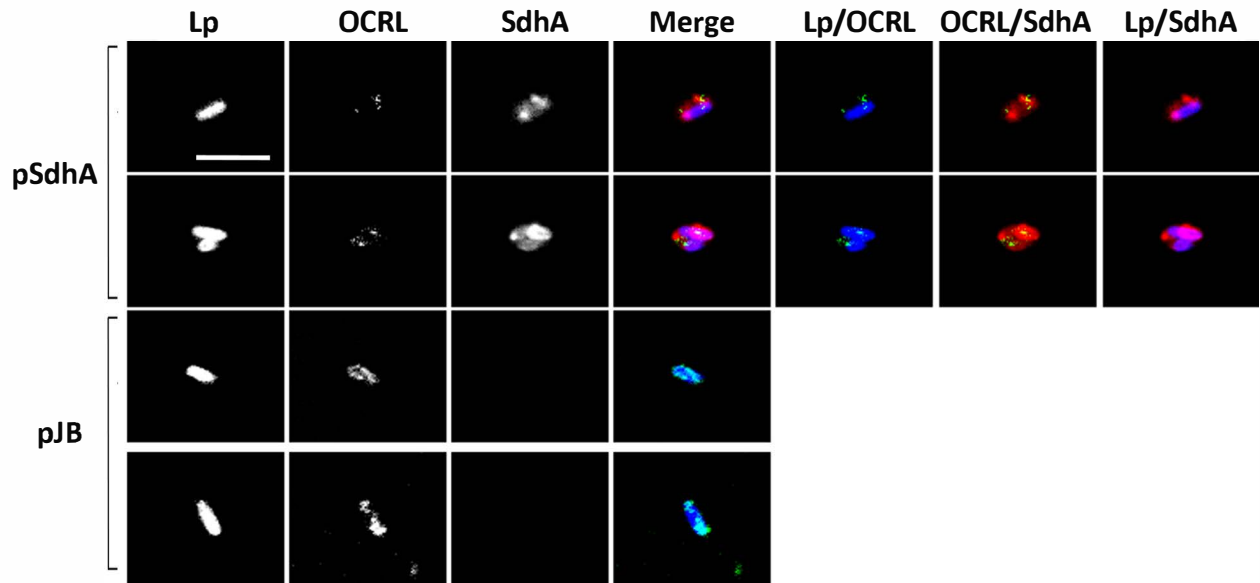

**Figure S4. OCRL localization about the LCV surface. Linked to Fig. 6D.**

Confocal images of vacuoles isolated from infected U937 cells (MOI=10, 3h) with  $\Delta$ sdhA mutant harboring pSdhA or pJB vector. The presence of OCRL and SdhA on LCVs was assessed by immunofluorescence using antibodies against OCRL, SdhA and *L. pneumophila* (Scale bar, 4  $\mu$ m).
